# Supplementary material for: A comparative study on electrorheological properties of various silica–conducting polymer core–shell nanospheres
Source: Royal Society of Chemistry journal article supplement (doi:10.1039/c0sm00286k), 2010-01-01
Supplement: c0sm00286k.pdf [file c0sm00286k.pdf]

Supplementary Material (ESI) for Soft Matter

This journal is (c) The Royal Society of Chemistry 2010

Supplementary Information for:

**A comparative study on electrorheological properties of various  
silica/conducting polymer core/shell nanospheres**

Jin-Yong Hong and Jyongsik Jang\*

*World Class University (WCU) program of Chemical Convergence for Energy & Environment  
(C2E2), School of Chemical and Biological Engineering, College of Engineering, Seoul  
National University (SNU), Seoul, Korea.*

[\*] E-mail: [jsjang@plaza.snu.ac.kr](mailto:jsjang@plaza.snu.ac.kr)

Tel.: +82-2-880-7069

Fax: +82-2-888-1604

## 1. Experimental Section

**Materials:** Ludox AS-40 aqueous colloidal solutions (Aldrich) were used as templates of silica nanoparticles with the diameter of *ca.* 22 nm. Iron (III) chloride (Aldrich, reagent grade, 97%) as an oxidizing agent was used without further purification. Thiophene (Aldrich, 99+%), pyrrole (Aldrich, 99+%), 3,4-ethyldioxythiophene (Aldrich, 99+%) and aniline (Aldrich, 99+%) as a monomer were used for the preparation of polythiophene (PT), polypyrrole (PPy), poly(ethyldioxythiophene) (PEDOT) and polyaniline (PANI), respectively. These monomers were used as received. Chloroform (99 %) was also obtained from Aldrich Chemical Co. For electrorheological (ER) fluid application, silicon oil (Aldrich, poly(methylphenylsiloxane), viscosity = 100 cSt) was used as a dispersing medium.

**Preparation of Oxidant-coated Silica Nanospheres:** Monodispersed silica nanosphere was prepared using Ludox AS-40 aqueous solution as a source of 22 nm silica nanospheres. The colloidal silica suspension (25 g) was poured into a beaker, and distilled water (25 ml) was added. Mixture solution was stirred vigorously and FeCl<sub>3</sub> (12.5 g) was inserted in mixed solution to make the weight ratio of 0.5 FeCl<sub>3</sub>-coated silica nanospheres. FeCl<sub>3</sub> was completely dissolved and allowed to dry at room temperature in order to evaporate water.

**Fabrication of Silica/conducting polymer Core/Shell Nanospheres:** 22 nm FeCl<sub>3</sub>-coated silica nanospheres (10 g) were dispersed in chloroform (100 mL). Thiophene monomer (0.15

mL) was introduced into the reactor and the mixture was stirred for 4 hr at 60 °C. After polymerization, the silica/PT core/shell nanospheres were washed with ethanol several times to remove residual reagent and dried under vacuum oven for ER fluids application. For various silica/conducting polymer core/shell nanospheres, overall process was the same as above procedure except the species of conducting polymer monomer, pyrrole, 3,4-ethyldioxythiophene and aniline, respectively.

***Silica/conducting polymer Core/Shell Nanospheres Characterization:*** Photographs of transmission electron microscopy (TEM) were obtained with a JEOL EM-2000 EX II microscope. In the sample preparation, the silica/conducting polymer core/shell nanospheres diluted in ethanol were cast onto copper grid. The electrical conductivity was measured by the four-probe method using a Keithley 2400 sourcemeter at room temperature. The charge carrier mobility value were acquired by an electrophoretic light scattering (ELS) apparatus (ELS-8000, Photal, Otsuka Electronics, Japan). Ultraviolet-visible (UV-vis) spectra were taken with a Perkin-Elmer Lambda 20 spectrometer at a resolution of 1 nm, and all the cyclic voltammograms (CV) were measured at a scan rate of 50 mVs<sup>-1</sup> in the potential range of -0.3 to 1.5 V.

***Investigation of Electrorheological Properties:*** The ER properties of the silica/PT core/shell nanospheres-based ER fluids were examined via a Rheometrics Mechanical

Spectrometer (RMS800, Rheometric Scientific) with a parallel plate fixture of 40 mm diameter, a high-voltage generator (Trek 677B), and a temperature controller. To start a run, an ER fluid is placed between two plates with a gap of 1.00 mm, and DC voltage is applied to the plate. An electric field was applied for 3 min to obtain an equilibrium chainlike or columnar structure before applying shear. All measurements were made at a bath temperature of  $25 \pm 0.1$  °C. The shear rate was varied from  $10^{-1}$  to  $10^3$  s<sup>-1</sup>, and yield stresses for the prepared ER fluids were mainly obtained under flow in a controlled shear rate (CSR) experiment.

## 2. TEM images of silica/conducting polymer core/shell nanosphere

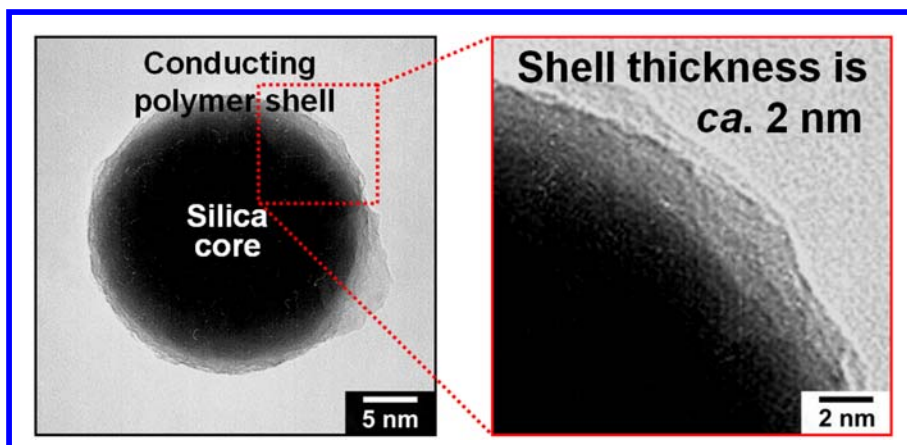

**Fig. S1** A typical TEM image of silica/conducting polymer core/shell nanosphere: (left) TEM image of a single silica/polypyrrole core/shell nanoparticles. (right) The enlarged image of the area marked by the red dash box in the left image. The particles had a uniform conducting polymer layer of average thickness 2 nm.

**Fig. S1** shows the transmission electron microscopy (TEM) images of the silica/conducting polymer core/shell nanosphere fabricated by seeded polymerization.

The TEM image revealed that the nanosphere had a uniform conducting polymer layer of avg. 2 nm.

### 3. DRIFT and EDAX spectra of the sample

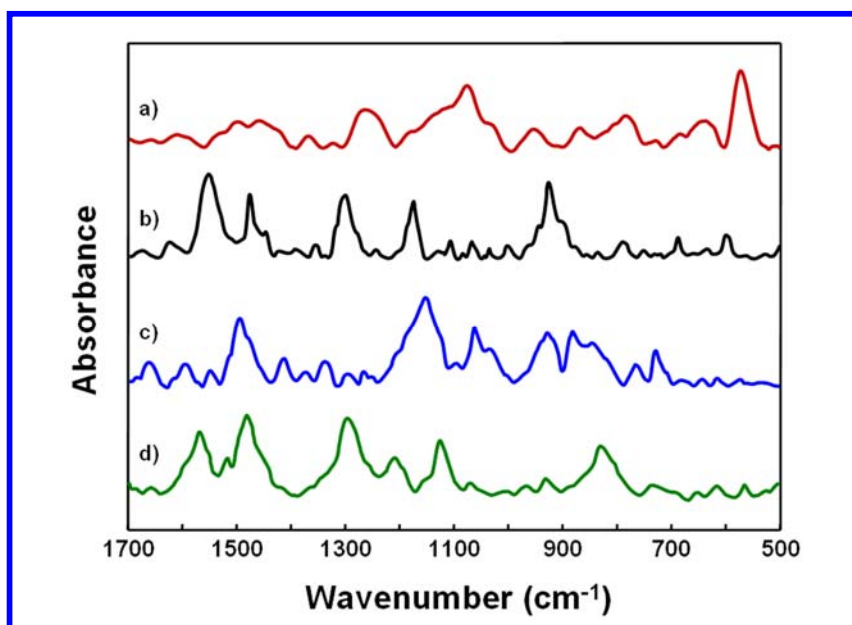

**Fig. S2** DRIFT spectra in the spectral region of 1700–500 cm<sup>-1</sup>; (a) silica/PT core/shell nanospheres, (b) silica/PPy core/shell nanospheres, (c) silica/PEDOT core/shell nanospheres and (d) silica/PANI core/shell nanospheres.

**Fig. S2** depicts the DRIFT spectra of various silica/conducting polymer core/shell nanospheres in the region of 1700–500 cm<sup>-1</sup>, and the spectrum provides the selective information of the conducting polymer shell. The characteristic peaks of silica/PT core/shell nanospheres (a) appear at 1076 cm<sup>-1</sup>, 747 cm<sup>-1</sup> and 572 cm<sup>-1</sup>, which are due to the C–H out-of-plane bend, asymmetric C–S–C deformation and thiophene ring deformation vibrations, respectively. The band at 1500 cm<sup>-1</sup>, 1459 cm<sup>-1</sup>, 1263 cm<sup>-1</sup> and 1369 cm<sup>-1</sup> can be assigned to the C=C in-plane vibration mode. A DRIFT spectra of silica/PPy core/shell nanospheres (b) indicated a pyrrole ring stretching band at 1548

$\text{cm}^{-1}$ , a conjugated C–N stretching band at  $1473 \text{ cm}^{-1}$ , a =C–H in-plane vibration band at  $1301$  and  $1183 \text{ cm}^{-1}$ , and a =C–H out-of-plane vibration band at  $916 \text{ cm}^{-1}$ . For the silica/PEDOT core/shell nanospheres (c), the band at  $844 \text{ cm}^{-1}$  could be ascribed to vibration mode of C–S bond in the thiophene ring. The bands at  $1144$  and  $1065 \text{ cm}^{-1}$  are assigned to the stretching modes of the ethylenedioxy group, and the band at  $920 \text{ cm}^{-1}$  is due to the ethylenedioxy ring deformation mode. The characteristic peak of the silica/PANI core/shell nanospheres (d) appeared at  $1582$ ,  $1484$ , and  $1310 \text{ cm}^{-1}$ , due to quinone ring deformation, benzene ring deformation, and C–N stretching of a secondary aromatic amine, respectively.

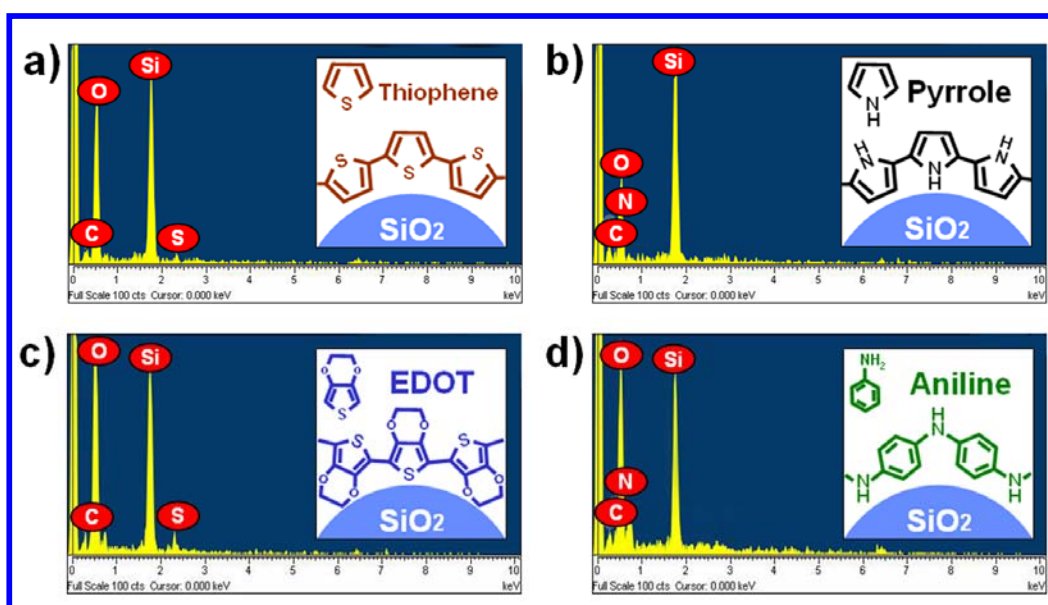

**Fig. S3** The energy-dispersive analysis of X-ray (EDAX) spectrum of silica/conducting polymer core/shell nanospheres; (a) silica/PT core/shell nanospheres, (b) silica/PPy core/shell nanospheres, (c) silica/PEDOT core/shell nanospheres and (d) silica/PANI core/shell nanospheres.

**In addition, the energy-dispersive analysis of X-ray (EDAX) provided the composition of the silica/conducting polymer core/shell nanospheres (Fig. S3). It mainly consisted of C, O, Si, N, and S. The Si and O peaks originated from the silica core. The elemental composition ratio (C/S or C/N) of the silica/conducting polymer core/shell nanospheres has good agreement with their theoretical values (Table S1).**

**Judging from these data, it can be concluded that a conducting polymer layer was successfully deposited on the surface of silica nanospheres. Namely, the silica/conducting polymer core/shell nanospheres were successfully synthesized by seeded polymerization.**

**Table S1.** Atomic and composition ratio of various silica/conducting polymer core/shell nanospheres

| Samples | Atomic ratio (%) <sup>a</sup> |      |      |       |       | Composition ratio |                |
|---------|-------------------------------|------|------|-------|-------|-------------------|----------------|
|         | C                             | N    | S    | Si    | O     | Theoretical value | Measured value |
| PT      | 6.98                          | –    | 4.67 | 36.01 | 52.34 | (C/S) 1.50        | (C/S) 1.49     |
| PPy     | 23.59                         | 6.79 | –    | 27.77 | 41.84 | (C/N) 3.43        | (C/N) 3.47     |
| PEDOT   | 9.76                          | –    | 4.26 | 30.36 | 55.22 | (C/S) 2.25        | (C/S) 2.29     |
| PANI    | 17.3                          | 3.39 | –    | 28.34 | 50.97 | (C/N) 5.14        | (C/N) 5.10     |

<sup>a</sup> These values were acquired in the EDAX mode for 45 s, at a beam current of 10  $\mu$ A, and an accelerating voltage of 10 kV.
